# Supplementary material
Source: PubMed Central journal article supplement (PMC4017366)
Supplement: supp_jit831_jit831supp.pdf [file supp_jit831_jit831supp.pdf]

**Supplementary Table 3: Type of Serotypes Shed by Method of Acquisition Using More Stringent Definitions**

| Serotype shed | a. Direct vaccination (n=64) |       | b. Community Acquisition (n=32) |       | c. Likely Community Acquisition (n=46) |       | p value |         |         |
|---------------|------------------------------|-------|---------------------------------|-------|----------------------------------------|-------|---------|---------|---------|
|               | n                            | %     | n                               | %     | n                                      | %     | a and b | a and c | b and c |
| Any Type 1    | 25                           | 39.1% | 0                               | 0.0%  | 4                                      | 9.1%  | <0.0001 | 0.0004  | 0.1     |
| Any Type 2    | 35                           | 54.7% | 27                              | 84.4% | 41                                     | 93.2% | 0.006   | <0.0001 | 0.7     |
| Any Type 3    | 38                           | 59.4% | 6                               | 18.8% | 4                                      | 9.1%  | 0.0002  | <0.0001 | 0.3     |

To ensure that our findings were not due to misclassifying OPV strains as community acquired from subjects who may have been intermittently shedding OPV strains since vaccination, we repeated the analysis using more stringent criteria. The 32 samples labeled “community acquisition” above are from subjects who did not receive OPV in the prior NIW. The 46 samples labeled “likely community acquisition” are from subjects who did receive OPV in the prior NIW, but who either had at least one prior negative sample, taken at least two days after receiving OPV, between the NIW and the positive sample, or were shedding on enrollment.
